# Supplementary material for: Dietary Supplementation of Caulerpa racemosa Ameliorates Cardiometabolic Syndrome via Regulation of PRMT-1/DDAH/ADMA Pathway and Gut Microbiome in Mice
Source: MDPI journal article supplement (doi:10.3390/nu15040909), 2023-02-11
Supplement: s1 [file s1]

# Supplementary File

**Table S1.** High-Performance Liquid Chromatography-Mass Spectrometry (HPLC-MS) of Caulerpin in Aqueous Extract of *Caulerpa racemosa* (AEC).

| Compound<br>(PubChem ID) | Molecular Formula                                             | Observed m/z | Category              | Chemical structure depiction of caulerpin                                            |
|--------------------------|---------------------------------------------------------------|--------------|-----------------------|--------------------------------------------------------------------------------------|
| Caulerpin (5326018)      | C <sub>24</sub> H <sub>18</sub> N <sub>2</sub> O <sub>4</sub> | 398.13278    | an indole<br>alkaloid | 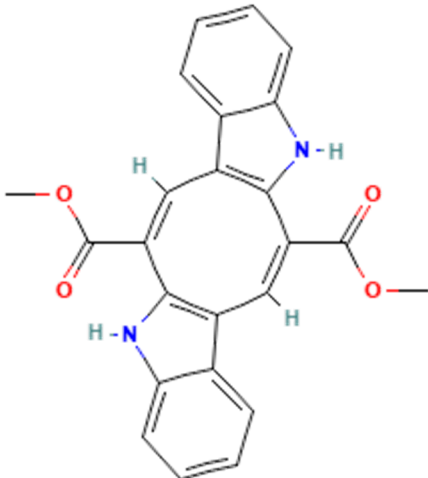 |

National Center for Biotechnology Information. PubChem Compound  
Summary for CID 5326018, Caulerpin.

<https://pubchem.ncbi.nlm.nih.gov/compound/Caulerpin>. Accessed 30  
January 2023

Test on caulerpin in the extract (sample) was carried out using liquid chromatography-mass spectrometry (LC-MS), and a mass of 398.13278 (397.12257 m/z) was obtained. This shows that there is an antioxidant compound caulerpin in the sample extract.
